# Supplementary material for: Mouse Spinal Cord Vascular Transcriptome Analysis Identifies CD9 and MYLIP as Injury-Induced Players
Source: MDPI journal article supplement (doi:10.3390/ijms24076433), 2023-03-29
Supplement: s1 [file s1]

## Supplemental material

**Table S1.** RNA-seq sample details, including metrics considered in pre-processing.

| Sample                  | Run | Days | Lesion | Condition | Decision  | Library size |
|-------------------------|-----|------|--------|-----------|-----------|--------------|
| M_3dpiSci_1_S_Run1_22   | 1   | 3dpi | Sci    | 3dpi Sci  | Kept      | 19.806.031   |
| M_3dpiSci2_S_Run1_4     | 1   | 3dpi | Sci    | 3dpi Sci  | Kept      | 13.671.058   |
| M_3dpiSci3_S_Run1_5     | 1   | 3dpi | Sci    | 3dpi Sci  | Kept      | 14.685.878   |
| M_3dpiSham1_S_Run1_1    | 1   | 3dpi | Sham   | 3dpi Sham | Removed   | 493.364      |
| M_3dpiSham2_S_Run1_2    | 1   | 3dpi | Sham   | 3dpi Sham | Removed   | 715.638      |
| M_3dpiSham3_S_Run1_3    | 1   | 3dpi | Sham   | 3dpi Sham | Kept      | 13.698.148   |
| M_7dpiSci_1_S_Run1_9    | 1   | 7dpi | Sci    | 7dpi Sci  | Kept      | 11.585.719   |
| M_7dpiSci_3_S_Run1_8    | 1   | 7dpi | Sci    | 7dpi Sci  | Removed   | 3.564.291    |
| M_7dpiSham_1_S_Run1_6   | 1   | 7dpi | Sham   | 7dpi Sham | Removed   | 50.047       |
| M_7dpiSham_2_S_Run1_7   | 1   | 7dpi | Sham   | 7dpi Sham | Kept      | 15.958.959   |
| M_7dpiSham_3_S_Run1_10  | 1   | 7dpi | Sham   | 7dpi Sham | Removed   | 2.025.102    |
| M_3dpiSham1_S_Run3_1    | 3   | 3dpi | Sham   | 3dpi Sham | Kept      | 12.245.908   |
| M_7_DpiSci_1A_S_Run3_4  | 3   | 7dpi | Sci    | 7dpi Sci  | Kept      | 9.298.239    |
| M_7_DpiSham_1A_S_Run3_3 | 3   | 7dpi | Sham   | 7dpi Sham | Kept      | 9.026.449    |
| M_3dpiSham2_S_Run4_2    | 4   | 3dpi | Sham   | 3dpi Sham | Kept      | 9.537.205    |
| M_7_DpiSham_1A_S_Run4_7 | 4   | 7dpi | Sham   | 7dpi Sham | Removed   | 1.564.290    |
| M_7dpiSham_1_S_Run4_3   | 4   | 7dpi | Sham   | 7dpi Sham | Removed   | 710.086      |
| M_7dpiSham_1_S_Run5_1   | 5   | 7dpi | Sham   | 7dpi Sham | Removed   | 371.243      |
| 0dpisham1b_S_Run7_10    | 7   | 0dpi | Sham   | 0dpi Sham | Kept      | 8.789.607    |
| 0dpisham2b_S_Run7_11    | 7   | 0dpi | Sham   | 0dpi Sham | Kept      | 7.804.849    |
| 0dpisham3b_S_Run7_12    | 7   | 0dpi | Sham   | 0dpi Sham | Removed * | 8.351.209    |
| 0dp1_sci1a_S_Run8_1     | 8   | 0dpi | Sci    | 0dpi Sci  | Kept      | 13.090.441   |
| 0dp1_sci2_S_Run8_2      | 8   | 0dpi | Sci    | 0dpi Sci  | Kept      | 11.474.316   |
| 0dp1_sci3a_S_Run8_3     | 8   | 0dpi | Sci    | 0dpi Sci  | Kept      | 13.340.809   |

\* Sample with more than 7 million read counts but removed due a low number of profiled genes.

**Table S2.** qPCR Primers.

| Name            | Sequence                 |
|-----------------|--------------------------|
| <i>cd9_Fw</i>   | CGGTCAAAGGAGGTAGCAAGT    |
| <i>cd9_Rv</i>   | TGAGAGTCGAATCGGAGCCATA   |
| <i>mylip_Fw</i> | CAGCTCCACTTTGAACAGCATC   |
| <i>mylip_Rv</i> | CCACTCTATGCCGTAGTTCTCC   |
| <i>PPIA_Fw</i>  | TATCTGCACTGCCAAGACTGAGTG |
| <i>PPIA_Rv</i>  | CTTCTTGCTGGTCTTGCCATTCC  |

**Table S3.** Western Blot Antibodies.

| Antigen      | Host   | Dilution | Reference                        | Secondary        | Dilution | Reference         |
|--------------|--------|----------|----------------------------------|------------------|----------|-------------------|
| <b>CD9</b>   | Rabbit | 1:1000   | Abcam - ab92726                  | Goat anti-rabbit | 1:3000   | BioRad - 1706515  |
| <b>MYLIP</b> | Rabbit | 1:500    | Invitrogen - PA5-106656          | Goat anti-rabbit | 1:3000   | BioRad - 1706515  |
| <b>GAPDH</b> | Mouse  | 1:1000   | ThermoFisher Scientific - AM4300 | Goat anti-mouse  | 1:4000   | CAYMAN - 10004302 |

**Table S4.** Immunohistochemistry Antibodies e details.

| Antigen | Host   | Dilution | Reference               | Retrieval                     | Blocking                        | Washing                  | Secondary                    | Dilution | Reference           |
|---------|--------|----------|-------------------------|-------------------------------|---------------------------------|--------------------------|------------------------------|----------|---------------------|
| CD9     | Rabbit | 1:100    | Abcam - ab92726         | Sodium Citrate Buffer, pH 6.0 | 1% BSA/0,3% Triton X-100 in PBS | 0,1% Triton X-100 in PBS | Donkey anti-rabbit 488       | 1:400    | Invitrogen - A21206 |
| *αSMA   | Mouse  | 1:100    | Sigma - C6198           |                               |                                 |                          | NA - Cy3 conjugated antibody |          |                     |
| CD31    | Goat   | 1:100    | RD Systems - AF3628     |                               |                                 |                          | Donkey anti-goat 647         | 1:500    | Invitrogen - A21447 |
| MYLIP   | Rabbit | 1:100    | Invitrogen - PA5-106656 | NA                            | 2% BSA/0,2% Triton X-100 in PBS | 0,2% Triton X-100 in PBS | Donkey anti-rabbit 488       | 1:500    | Invitrogen - A21206 |
| CD13    | Rat    | 1:100    | BioRad - MCA2183T       |                               |                                 |                          | Donkey anti-rat 647          | 1:500    | 712-605-153         |
| CD31    | Goat   | 1:100    | RD Systems - AF3628     |                               |                                 |                          | Donkey anti-goat 568         | 1:500    | Invitrogen - A11057 |

\* CD13 was used as a gold standard immunostaining to detect pericytes. CD13 however does not work with the antigen retrieval protocol necessary to detect CD9. Given this, we used a compatible antibody for pericytes detection (αSMA).
